# Supplementary material for: Efficacy of Pulmonary Rehabilitation in Post-COVID-19: A Systematic Review and Meta-Analysis
Source: MDPI journal article supplement (doi:10.3390/biomedicines11082213), 2023-08-07
Supplement: s1 [file s1]

**Figure S1: Subgroup analysis of Randomized Controlled Trials**  
[36,39,40,41,42,46,47,50,52,54,56,66,68,70,71]

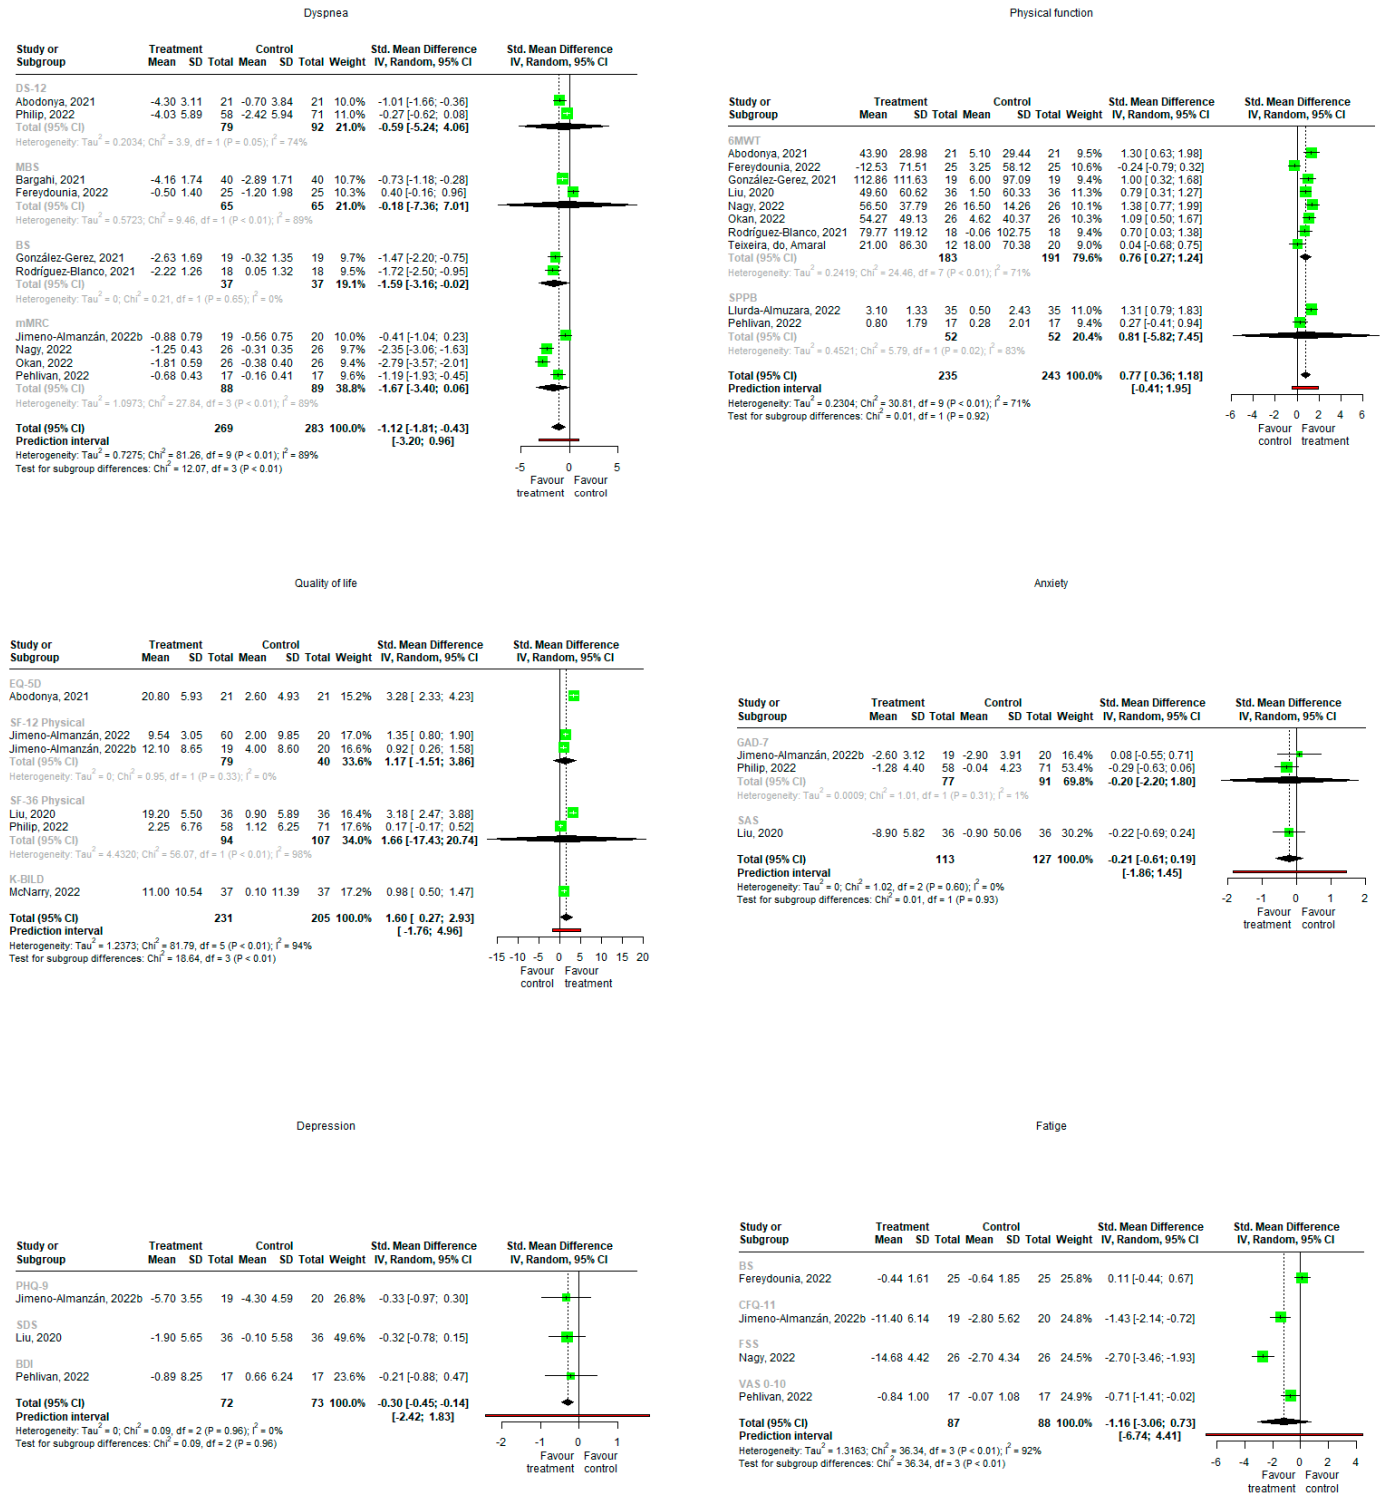

**Figure S2:** Subgroup analysis of Observational studies [43,44,53,57,59,60,61,63,64,67,69].

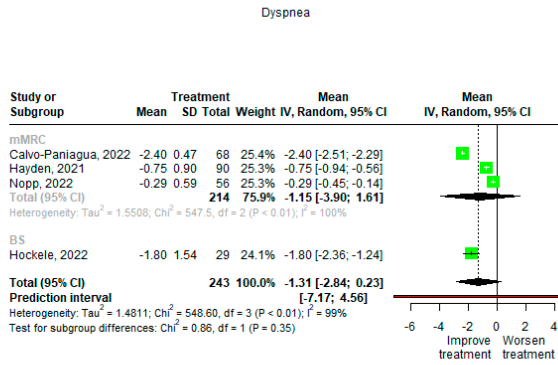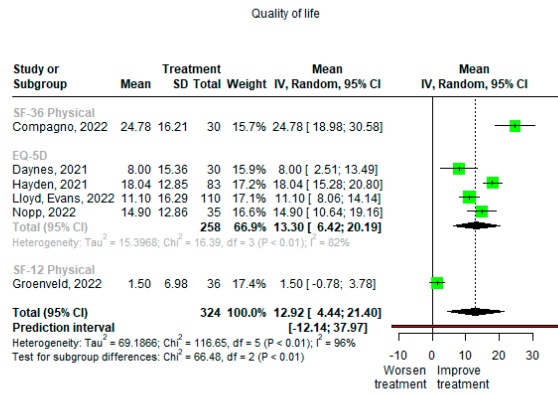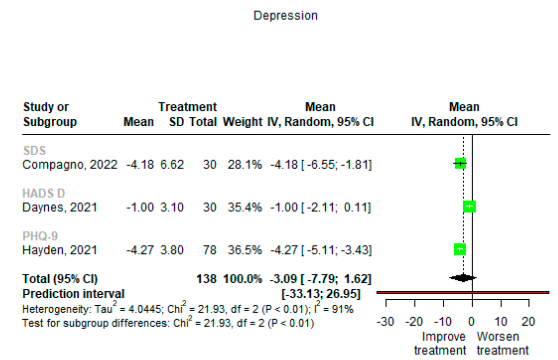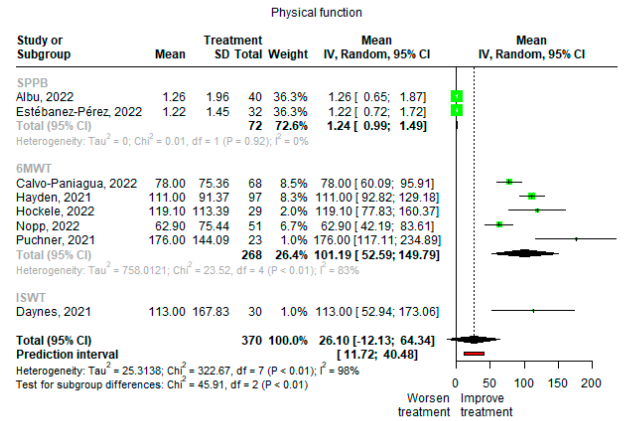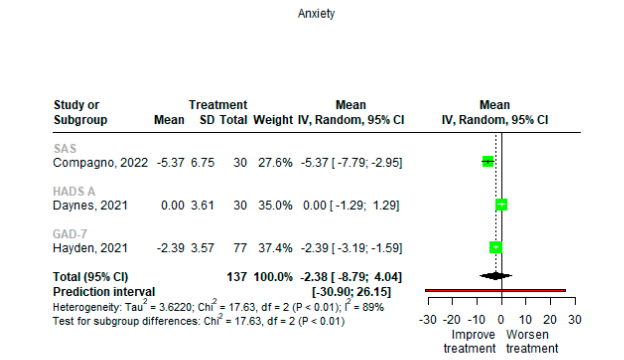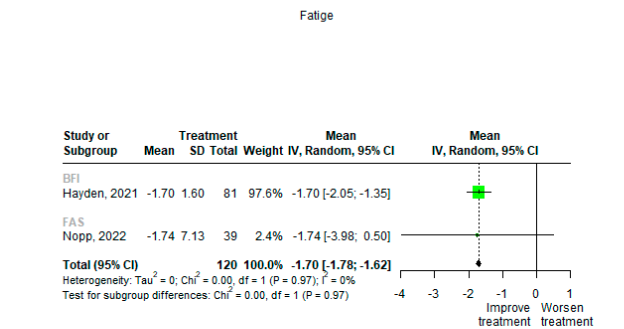

**Figure S3:** Outlier studies analysis for RCT [36,39,40,41,42,46,47,50,52,54,56,66,68,70,71].

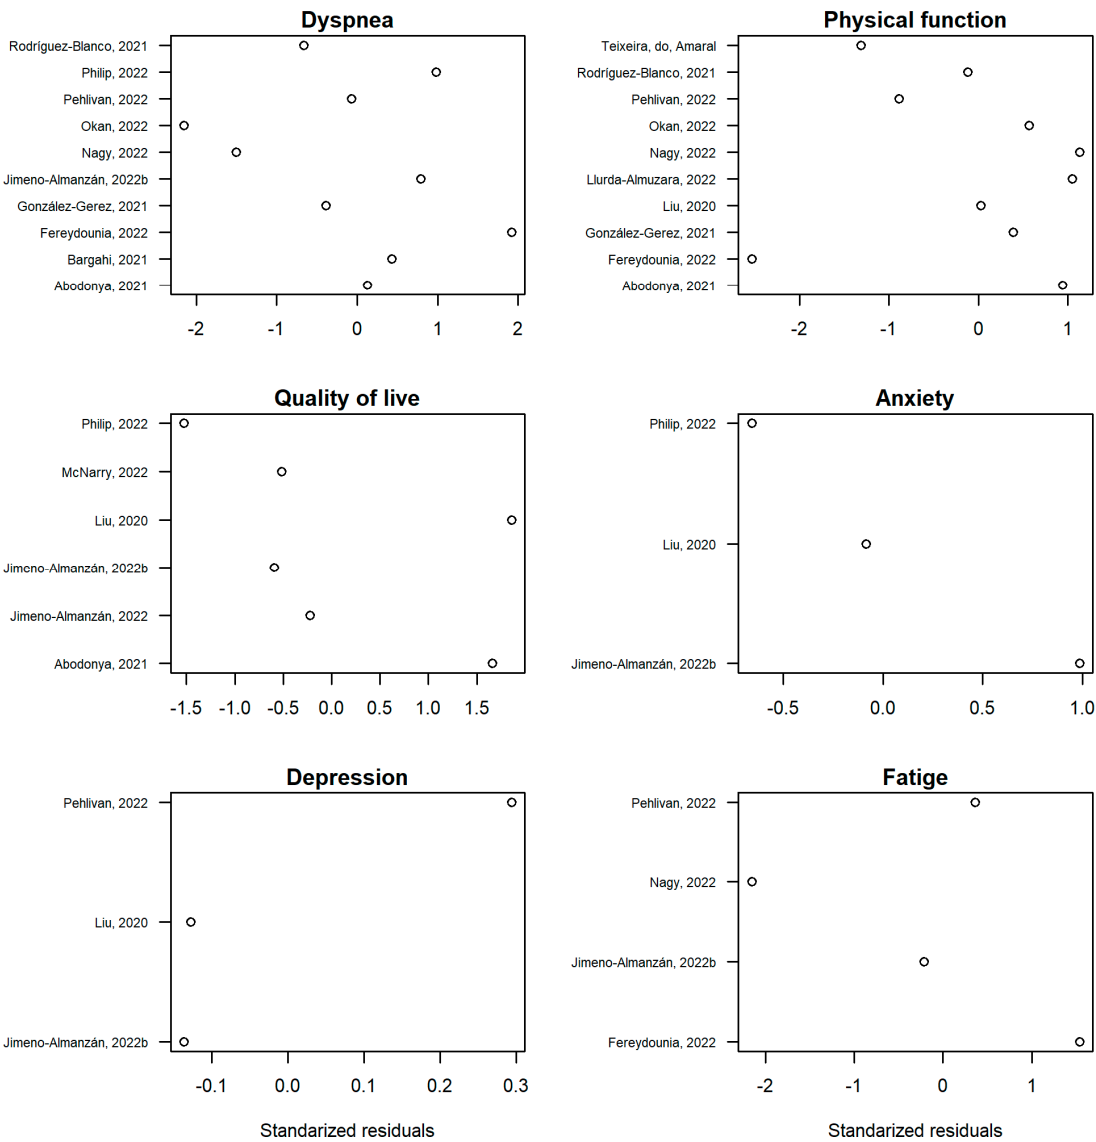

**Figure S4:** Outlier studies analysis for observational studies [43,44,53,57,59,60,61,63,64,67,69].

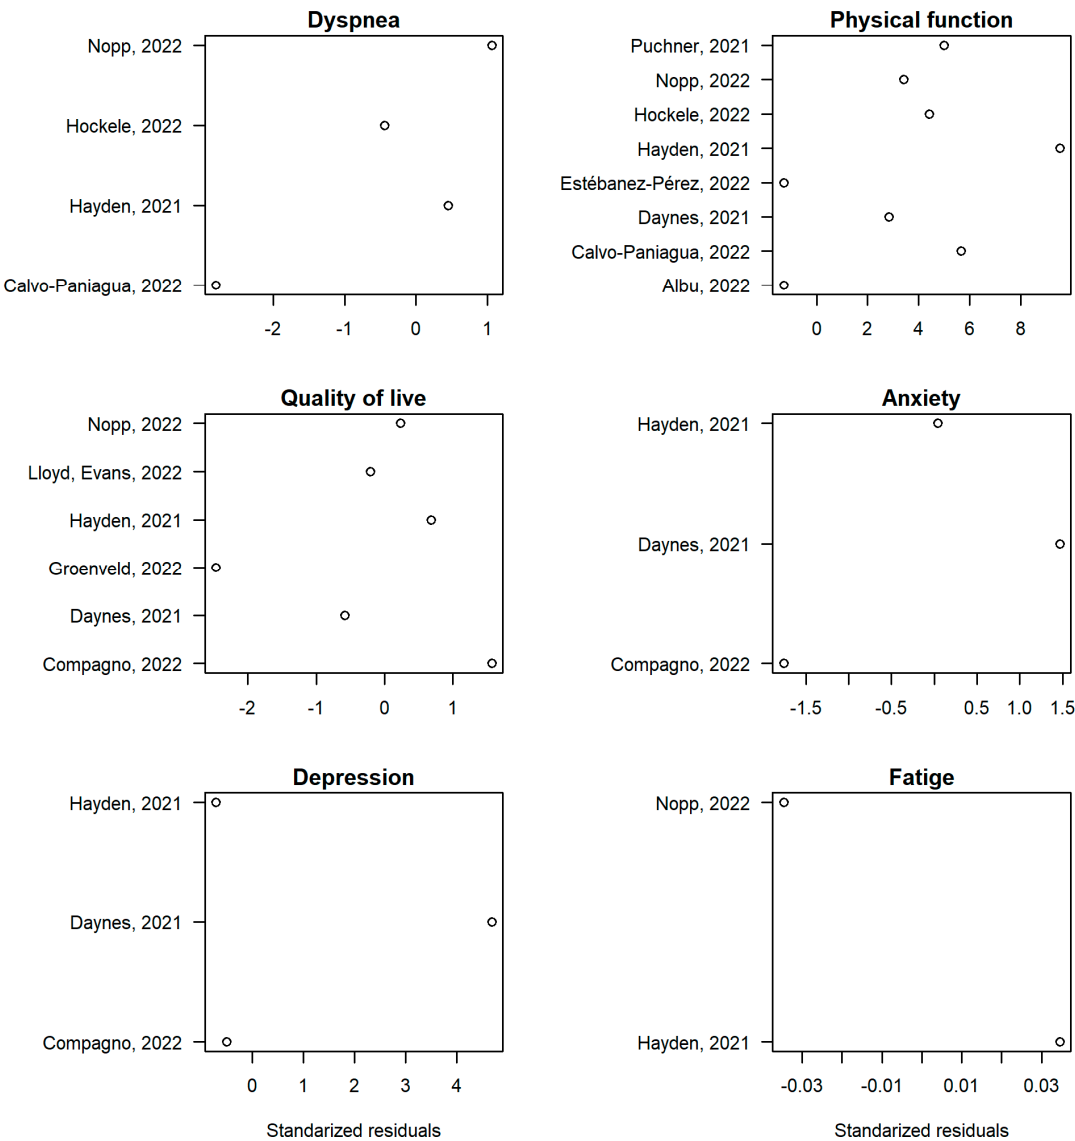

**Figure S5:** Leave-one-out analysis in RCT studies [36,39,40,41,42,46,47,50,52,54,56,66,68,70,71]

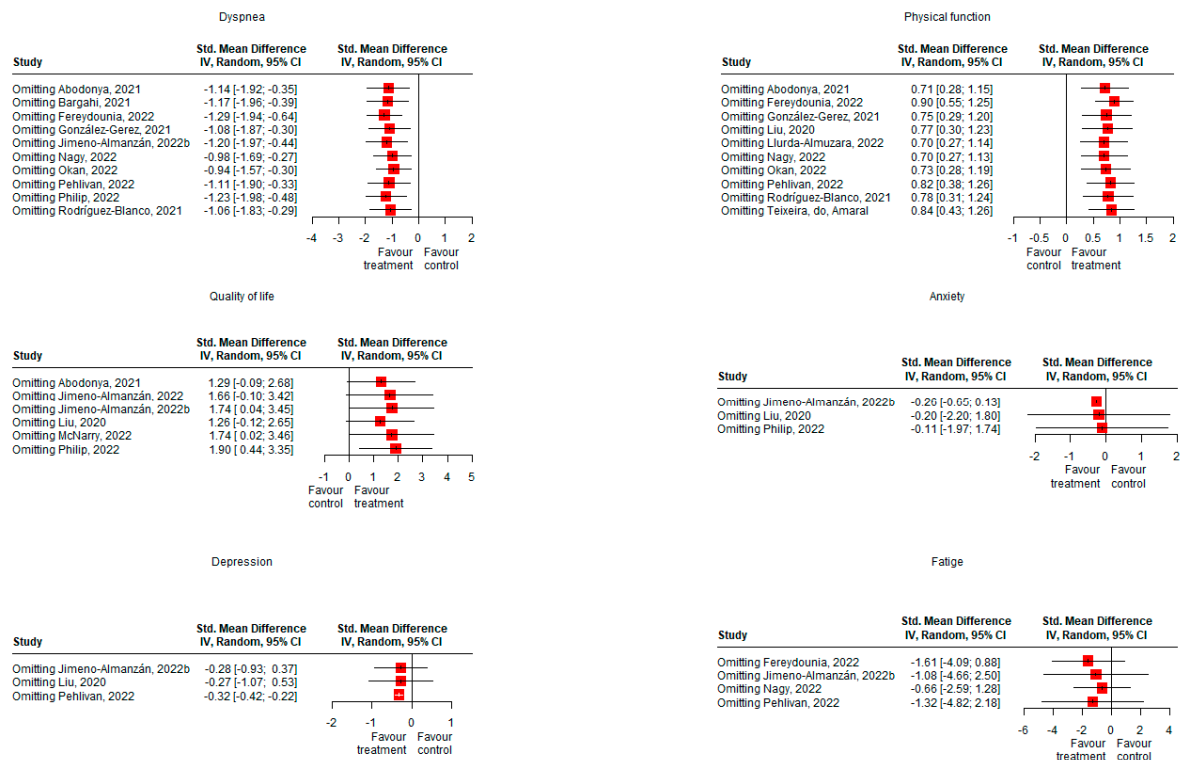

**Figure S6:** Leave-one-out analysis in observational studies [43,44,53,57,59,60,61,63,64,67,69].

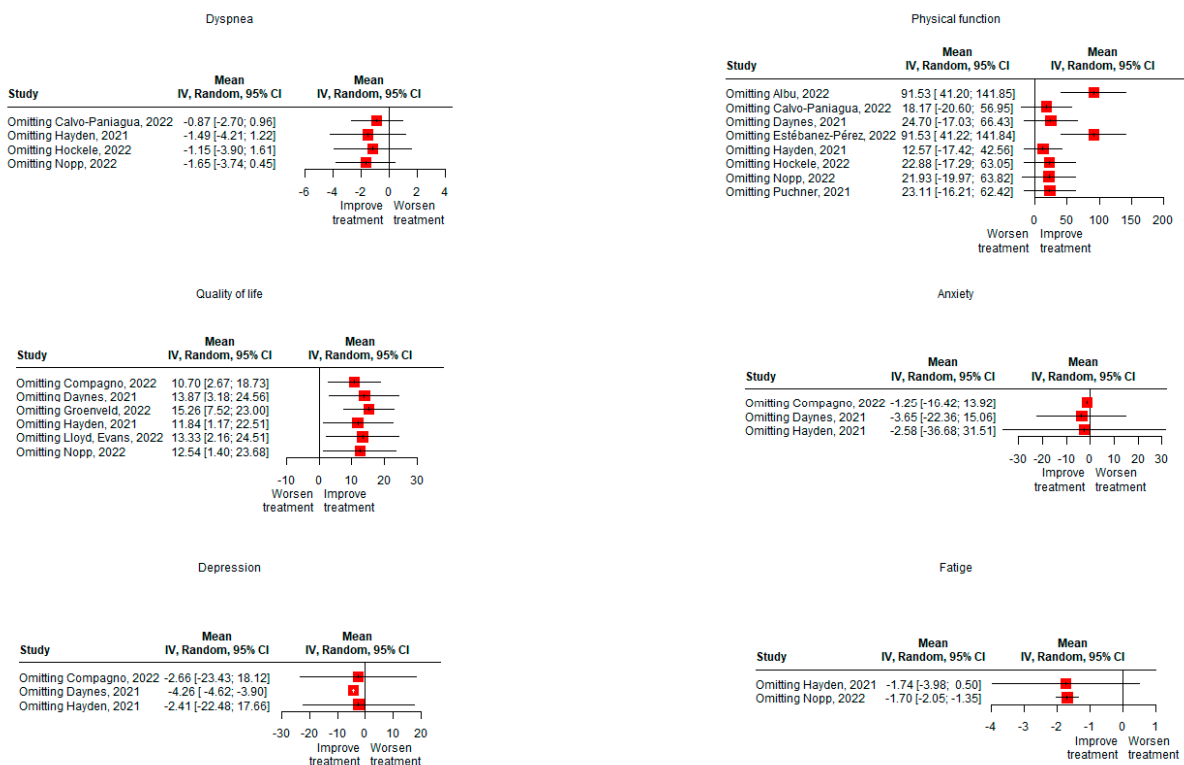

**Figure S7:** Baujat plot in RCT studies [36,39,40,41,42,46,47,50,52,54,56,66,68,70,71]

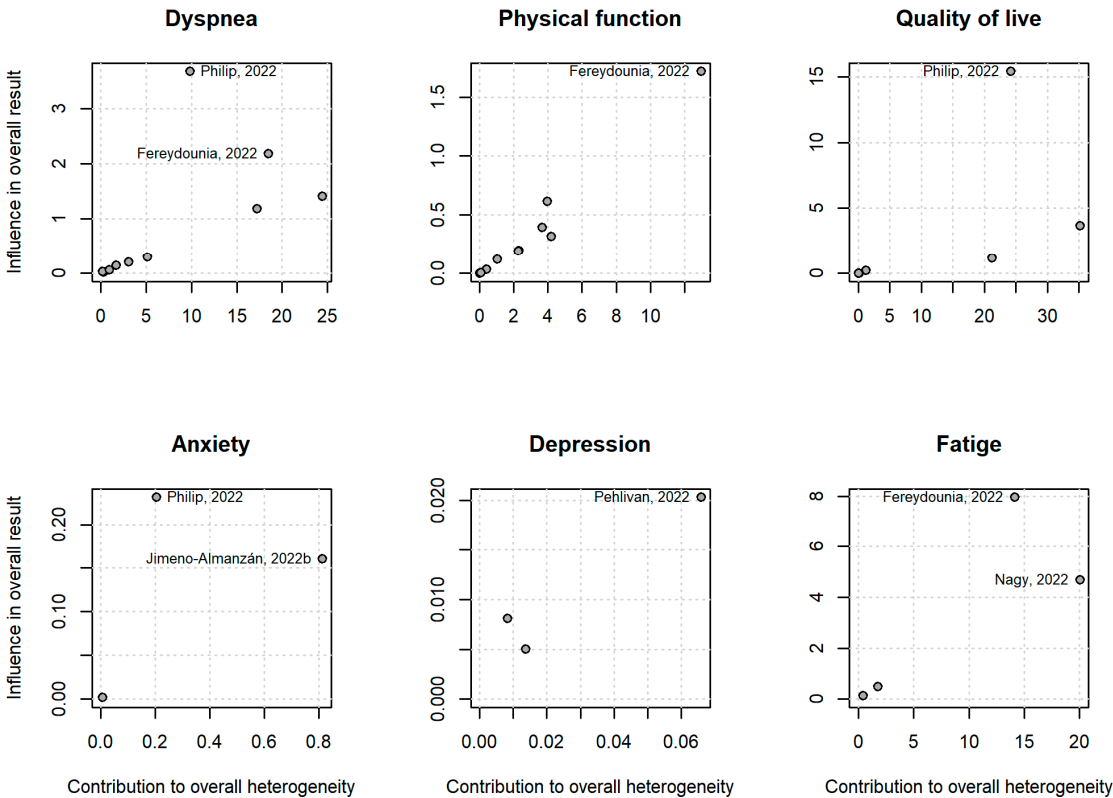

**Figure S8:** Baujat plot in observational studies [43,44,53,57,59,60,61,63,64,67,69].

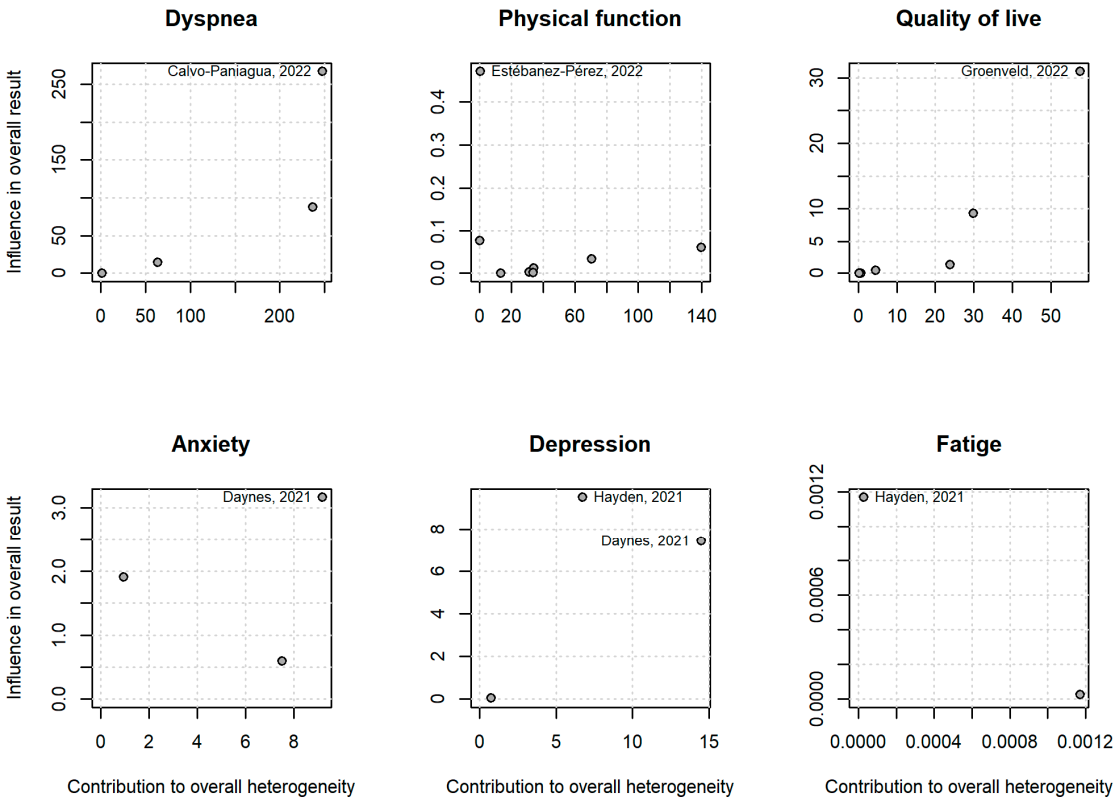

Figure S9: Funnel plot in RCT studies [36,39,40,41,42,46,47,50,52,54,56,66,68,70,71]

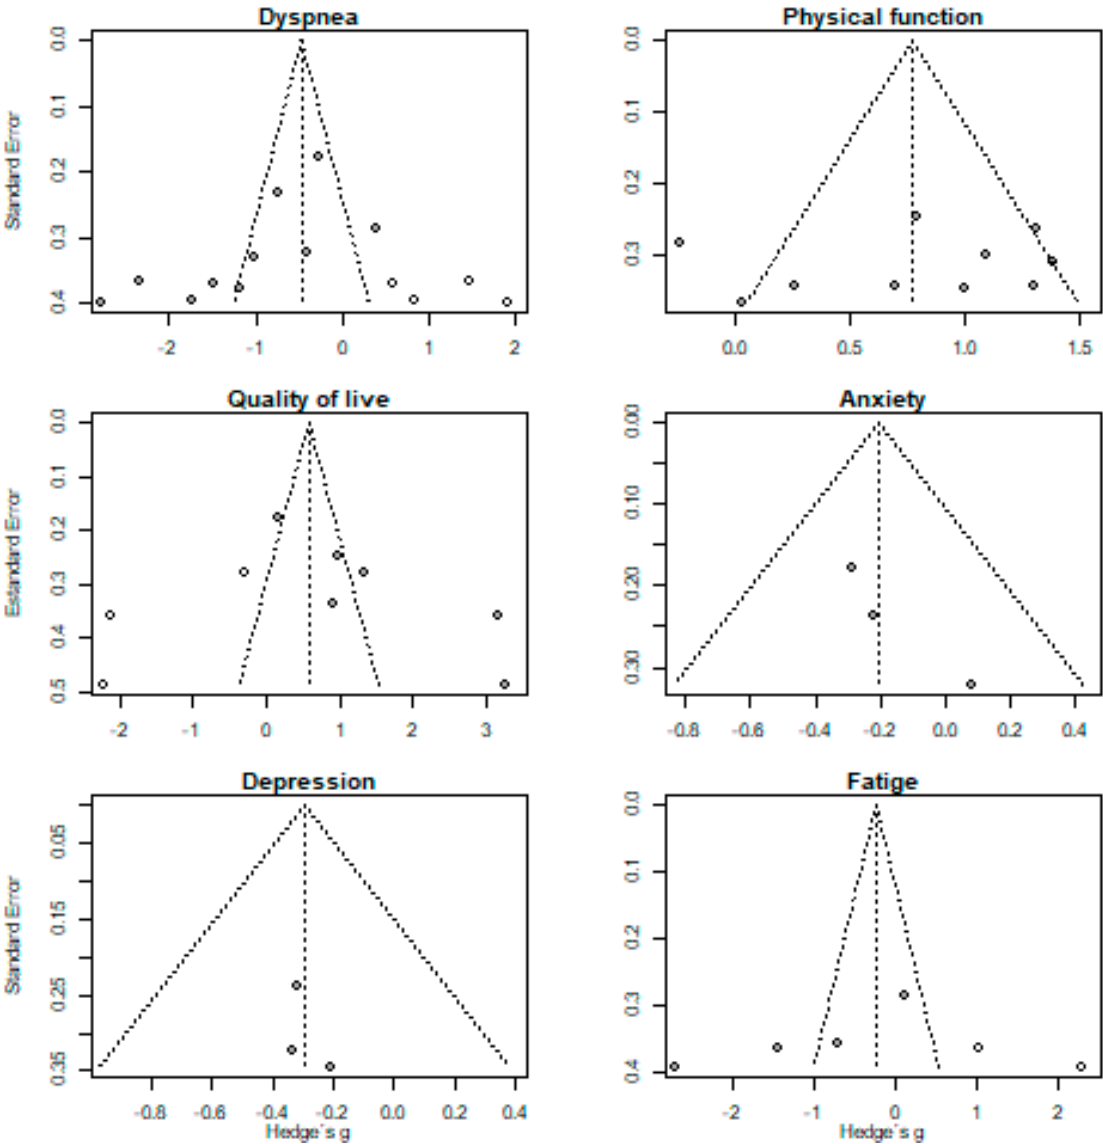



**Figure S10:** Funnel plot in observational studies [43,44,53,57,59,60,61,63,64,67,69].

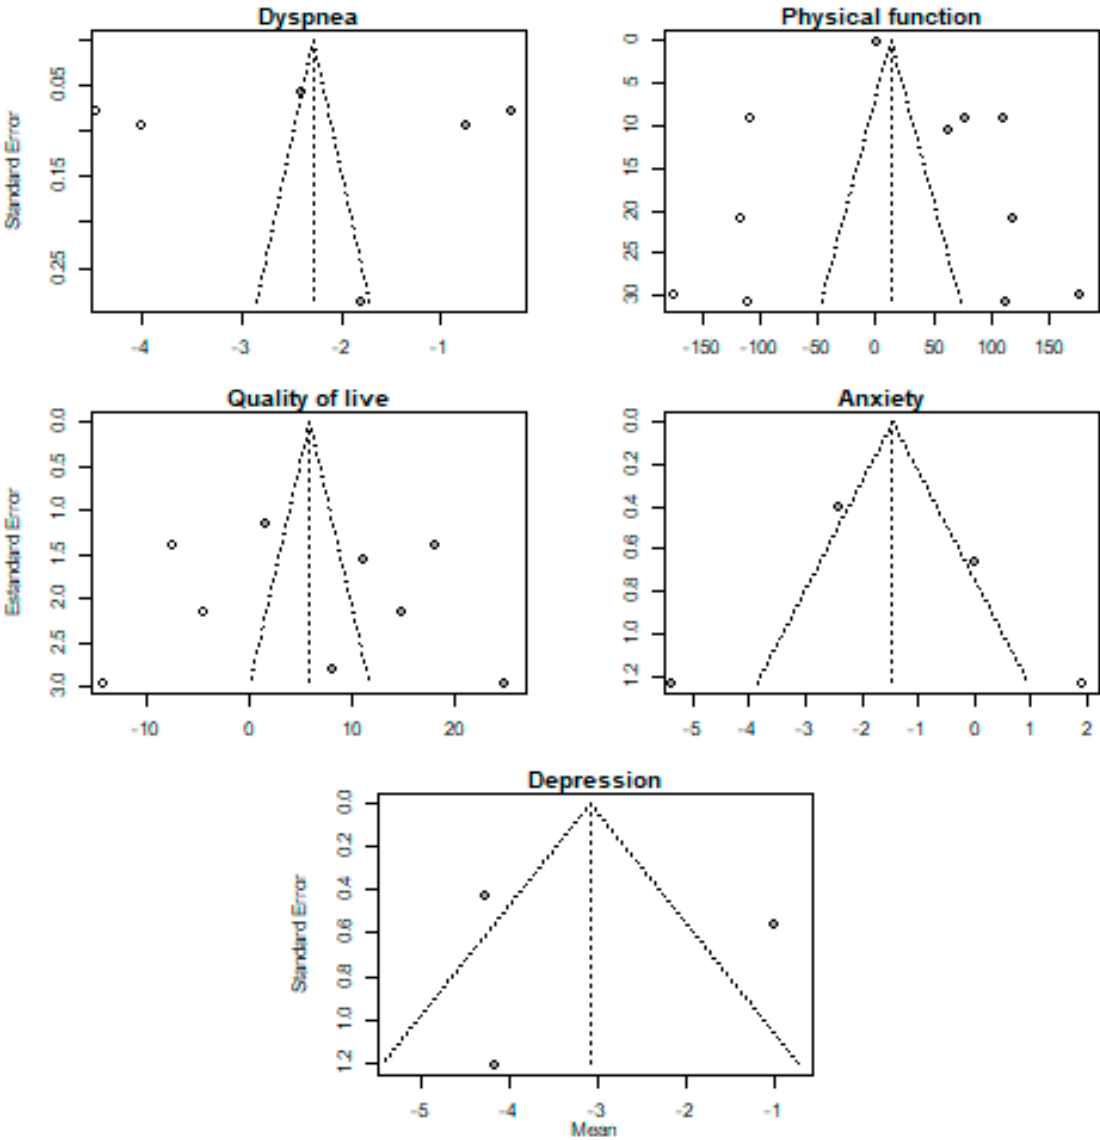

**Table S2:** Begg and Egger test for publication bias in included studies [36,39-44,46,47,50,52-54,56,57,59-61,63,64,66-71]

| RCTs                         | Begg test                               | Egger test                |
|------------------------------|-----------------------------------------|---------------------------|
| Dyspnea                      | Kendall's $\tau=-0.689$ , $p=0.005$     | $t(8)=-2.802$ , $p=0.023$ |
| Physical function            | Kendall's $\tau=-0.289$ , $p=0.291$     | $t(8)=-0.473$ , $p=0.649$ |
| Quality of live              | Kendall's $\tau=0.6$ , $p=0.136$        | $t(4)=3.405$ , $p=0.027$  |
| Anxiety                      | Kendall's $\tau=1$ , $p=0.333$          | $t(1)=3.2$ , $p=0.193$    |
| Depression                   | Kendall's $\tau=0.333$ , $p=>0.999$     | $t(1)=0.688$ , $p=0.616$  |
| Fatigue                      | Kendall's $\tau=-1$ , $p=0.083$         | $t(2)=-3.144$ , $p=0.088$ |
| <b>Observational studies</b> |                                         |                           |
| Dyspnea                      | Kendall's $\tau=0$ , $p=>0.999$         | $t(2)=-0.316$ , $p=0.782$ |
| Physical function            | Kendall's $\tau=0.071$ , $p=0.905$      | $t(6)=6.107$ , $p=0.001$  |
| Quality of live              | Kendall's $\tau=0.2$ , $p=0.719$        | $t(4)=1.14$ , $p=0.318$   |
| Anxiety                      | Kendall's $\tau=-0.333$ ,<br>$p=>0.999$ | $t(1)=-0.967$ , $p=0.511$ |
| Depression                   | Kendall's $\tau=0.333$ , $p=>0.999$     | $t(1)=-0.305$ , $p=0.811$ |
| Fatigue                      | Kendall's $\tau=-1$ , $p=>0.999$        |                           |

$t(df)$ : t statistic (degrees of freedom).  
Significant if  $p<0.05$  (shown in red).
